# Supplementary material
Source: MDPI journal article supplement (https://www.mdpi.com/2304-6740/12/5/133)
Supplement: s1 [file s1]

# Supporting Information

## Mechanism of Anti-Trypanosoma cruzi Action of Gold(I) Compounds: A Theoretical and Experimental Approach

Javiera Órdenes-Rojas <sup>1,2</sup>, Paola Risco <sup>3</sup>, José Ortega-Campos <sup>1,2</sup>, Germán Barriga-González <sup>3</sup>, Ana Liempi <sup>2</sup>, Ulrike Kemmerling <sup>2</sup>, Dinorah Gambino <sup>4</sup>, Lucía Otero <sup>4</sup>, Claudio Olea Azar <sup>1,\*</sup> and Esteban Rodríguez-Arce <sup>1,4,\*</sup>

<sup>1</sup> Departamento de Química Inorgánica y Analítica, Facultad de Ciencias Químicas y Farmacéuticas, Universidad de Chile, Dr. Carlos Lorca Tobar 964, Casilla 223, Santiago 8380494, Chile

<sup>2</sup> Instituto de Ciencias Biomédicas, Facultad de Medicina, Universidad de Chile, Av. Independencia 1027, Santiago 8380453, Chile

<sup>3</sup> Laboratorio MACEDONIA, Departamento de Química, Universidad Metropolitana de Ciencias de la Educación, Av. José Pedro Alessandri 774, Santiago 7760197, Chile

<sup>4</sup> Área Química Inorgánica, Facultad de Química, Universidad de la República, Gral. Flores 2124, Montevideo 11800, Uruguay

\* Correspondence: colea@uchile.cl (C.O.A.); esteban.rodriguez.arce@gmail.com (E.R.-A.)

**Table S1:** Natural Bond Orbital (NBO) results for [AuCl(HL2)] (**2**) compound

| Spin     | Donor (L) NBO |                     | Acceptor (NL) NBO |                     | E(2)<br>kcal/mol |
|----------|---------------|---------------------|-------------------|---------------------|------------------|
| $\alpha$ | 33.           | LP (1) N 11         | 97.               | BD*(2) N 9 – C10    | 79.66            |
| $\alpha$ | 75.           | BD (1) S 12 – Au 13 | 97.               | BD*(2) N 9 – C10    | 9.05             |
| $\alpha$ | 44.           | LP (4) Cl 21        | 103.              | BD*(1) S 12 – Au 13 | 73.31            |
| $\beta$  | 31.           | LP (1) N 6          | 103.              | BD*(1) O 15 – O 16  | 1065.04          |
| $\beta$  | 33.           | LP (1) N 9          | 98.               | BD*(2) C 10–N 11    | 64.60            |
| $\beta$  | 73.           | BD (1) S 12 – Au 13 | 98.               | BD*(2) C 10 – N 11  | 9.67             |
| $\beta$  | 44.           | LP (4) Cl 14        | 102.              | BD*(1) S 12 – Au 13 | 73.43            |

**Table S2:** Natural Bond Orbital (NBO) results for [AuCl(HL3)] (**3**) compound

| Spin     | Donor (L) NBO |                     | Acceptor (NL) NBO |                     | E(2)<br>kcal/mol |
|----------|---------------|---------------------|-------------------|---------------------|------------------|
| $\alpha$ | 34.           | LP (1) N 11         | 101.              | BD*(2) N 9 – C 10   | 80.40            |
| $\alpha$ | 76.           | BD (1) S 12 – Au 13 | 101.              | BD*(2) N 9 – C 10   | 7.90             |
| $\alpha$ | 45.           | LP (4) Cl 14        | 107.              | BD*(1) S 12 – Au 13 | 73.09            |
| $\beta$  | 32.           | LP (1) N 6          | 107.              | BD*(1) O 15 – O 16  | 1066.05          |
| $\beta$  | 34.           | LP (1) N 9          | 102.              | BD*(2) C 10–N 11    | 62.91            |
| $\beta$  | 74.           | BD (1) S 12 – Au 13 | 102.              | BD*(2) C 10–N 11    | 8.39             |
| $\beta$  | 45.           | LP (4) Cl 14        | 106.              | BD*(1) S 12 – Au 13 | 73.23            |

**Table S3:** Natural Bond Orbital (NBO) results for [AuCl(HL4)] (**4**) compound

| Spin     | Donor (L) NBO |              | Acceptor (NL) NBO |                     | E(2)<br>kcal/mol |
|----------|---------------|--------------|-------------------|---------------------|------------------|
| $\alpha$ | 38.           | LP (1) N 11  | 113.              | BD*(2) N 9 – C 10   | 70.25            |
| $\alpha$ | 40.           | LP (2) S 12  | 113.              | BD*(2) N 9 – C 10   | 21.79            |
| $\beta$  | 36.           | LP (1) N 6   | 119.              | BD*(1) O 15 – O 16  | 1044.90          |
| $\beta$  | 38.           | LP (1) N 11  | 112.              | BD*(2) N 9 – C 10   | 75.62            |
| $\beta$  | 40.           | LP (2) S 12  | 112.              | BD*(2) N 9 – C 10   | 22.81            |
| $\beta$  | 49.           | LP (4) Cl 14 | 118.              | BD*(1) S 12 – Au 13 | 73.14            |

| Spin     | D – A NBO                                                                                         | E(2)<br>kcal/mol |
|----------|---------------------------------------------------------------------------------------------------|------------------|
| $\alpha$ | 32. – 93.<br>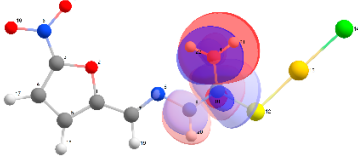   | 73.13            |
| $\alpha$ | 34. – 93<br>    | 33.07            |
| $\alpha$ | 43. – 99.<br>   | 75.17            |
| $\beta$  | 30. – 99.<br>  | 1075.57          |
| $\beta$  | 32. – 93.<br> | 68.87            |
| $\beta$  | 34. – 93.<br> | 35.94            |
| $\beta$  | 43. – 98.<br> | 75.13            |

**Figure S1:** Natural Bond Orbital (NBO) selected bond for [AuCl(HL1)] (1) compound

| Spin     | D – A NBO  |                                                                                      | E(2) kcal/mol |
|----------|------------|--------------------------------------------------------------------------------------|---------------|
| $\alpha$ | 33. – 97.  | 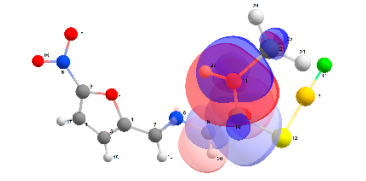   | 79.66         |
| $\alpha$ | 75. – 97.  |    | 9.05          |
| $\alpha$ | 44. – 103. |    | 73.31         |
| $\beta$  | 31. – 103. |   | 1065.04       |
| $\beta$  | 33. – 98.  |  | 64.60         |
| $\beta$  | 73. – 98.  |  | 9.67          |
| $\beta$  | 44. – 102. |  | 73.43         |

**Figure S2:** Natural Bond Orbital (NBO) selected bond for [AuCl(HL2)] (**2**) compound

| Spin     | D – A NBO                                                                                          | E(2) kcal/mol |
|----------|----------------------------------------------------------------------------------------------------|---------------|
| $\alpha$ | 34. – 101.<br>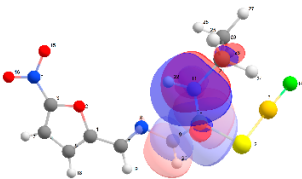    | 80.40         |
| $\alpha$ | 76. – 101.<br>   | 7.90          |
| $\alpha$ | 45. – 107.<br>   | 73.09         |
| $\beta$  | 32. – 107.<br>   | 1066.05       |
| $\beta$  | 34. – 102.<br>  | 62.91         |
| $\beta$  | 74. – 102.<br> | 8.39          |
| $\beta$  | 45. – 106.<br> | 73.23         |

**Figure S3:** Natural Bond Orbital (NBO) selected bond for [AuCl(HL3)] (**3**) compound

| Spin     | D – A NBO                                                                                          | E(2) kcal/mol |
|----------|----------------------------------------------------------------------------------------------------|---------------|
| $\alpha$ | 38. – 113.<br>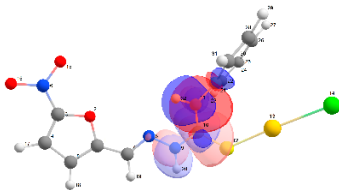   | 70.25         |
| $\alpha$ | 40. – 113.<br>   | 21.79         |
| $\beta$  | 36. – 119.<br>   | 1044.90       |
| $\beta$  | 38. – 112.<br>  | 75.62         |
| $\beta$  | 40. – 112.<br> | 22.81         |
| $\beta$  | 49. – 118.<br> | 73.14         |

**Figure S4:** Natural Bond Orbital (NBO) selected bond for [AuCl(HL4)] (**4**) compound

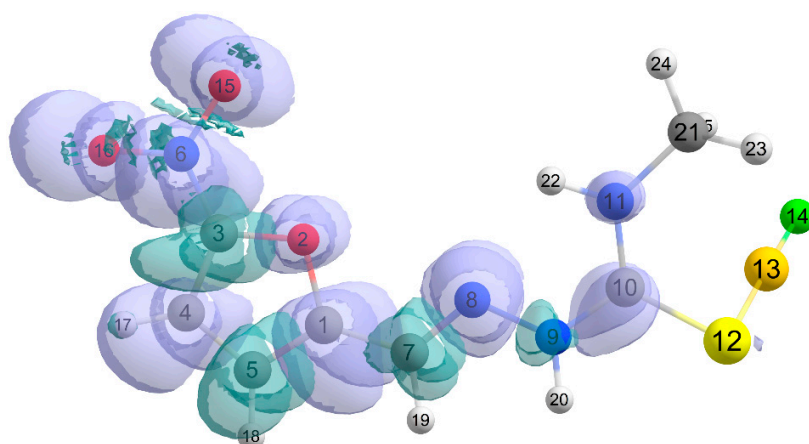

**Figure S5:** Spin density calculated for  $[\text{AuCl}(\text{HL2})]$  (**2**) compound

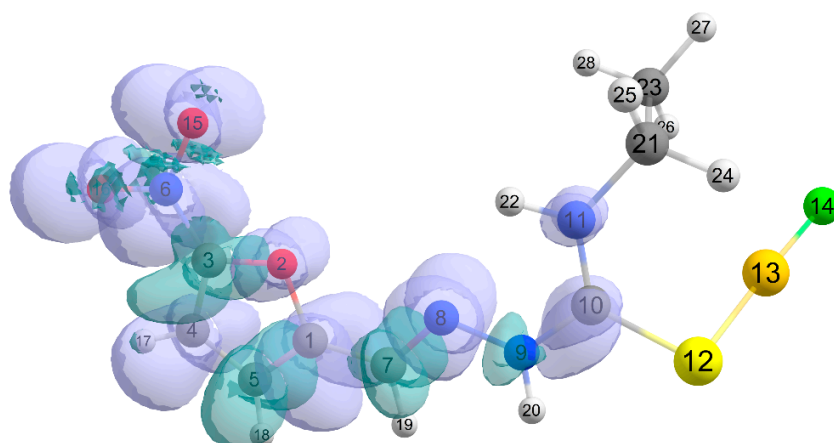

**Figure S6:** Spin density calculated for  $[\text{AuCl}(\text{HL3})]$  (**3**) compound

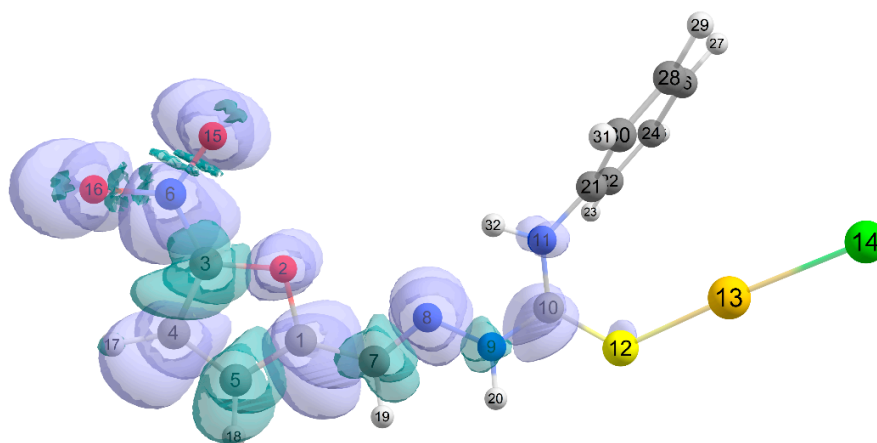

**Figure S7:** Spin density calculated for  $[\text{AuCl}(\text{HL4})]$  (**4**) compound

**Table S4:** Spin density calculated by ORCA for [AuCl(HL)] compounds

| [AuCl(HL1)] |           | [AuCl(HL2)] |           | [AuCl(HL3)] |           | [AuCl(HL4)] |           |
|-------------|-----------|-------------|-----------|-------------|-----------|-------------|-----------|
| <b>C1</b>   | 0,110249  | <b>C1</b>   | 0,109644  | <b>C1</b>   | 0,109588  | <b>C1</b>   | 0,107825  |
| <b>O2</b>   | 0,06127   | <b>O2</b>   | 0,061964  | <b>O2</b>   | 0,06184   | <b>O2</b>   | 0,062917  |
| <b>C3</b>   | 0,007067  | <b>C3</b>   | 0,007871  | <b>C3</b>   | 0,007686  | <b>C3</b>   | 0,010055  |
| <b>C4</b>   | 0,095429  | <b>C4</b>   | 0,093705  | <b>C4</b>   | 0,093971  | <b>C4</b>   | 0,090157  |
| <b>C5</b>   | -0,062236 | <b>C5</b>   | -0,061893 | <b>C5</b>   | -0,061881 | <b>C5</b>   | -0,06049  |
| <b>N6</b>   | 0,202404  | <b>N6</b>   | 0,199949  | <b>N6</b>   | 0,200306  | <b>N6</b>   | 0,196242  |
| <b>C7</b>   | 0,011783  | <b>C7</b>   | 0,013145  | <b>C7</b>   | 0,013038  | <b>C7</b>   | 0,017251  |
| <b>N8</b>   | 0,149215  | <b>N8</b>   | 0,15112   | <b>N8</b>   | 0,150759  | <b>N8</b>   | 0,152195  |
| <b>N9</b>   | 0,003226  | <b>N9</b>   | 0,002067  | <b>N9</b>   | 0,002081  | <b>N9</b>   | 0,000466  |
| <b>C10</b>  | 0,019612  | <b>C10</b>  | 0,020673  | <b>C10</b>  | 0,020842  | <b>C10</b>  | 0,022055  |
| <b>N11</b>  | 0,0088    | <b>N11</b>  | 0,012168  | <b>N11</b>  | 0,012004  | <b>N11</b>  | 0,00945   |
| <b>S12</b>  | 0,010499  | <b>S12</b>  | 0,006895  | <b>S12</b>  | 0,006579  | <b>S12</b>  | 0,010702  |
| <b>Au13</b> | 0,001745  | <b>Au13</b> | 0,001728  | <b>Au13</b> | 0,001637  | <b>Au13</b> | 0,001868  |
| <b>Cl14</b> | 0,000122  | <b>Cl14</b> | 0,000416  | <b>Cl14</b> | 0,000475  | <b>Cl14</b> | 0,000287  |
| <b>O15</b>  | 0,194452  | <b>O15</b>  | 0,193022  | <b>O15</b>  | 0,193296  | <b>O15</b>  | 0,191827  |
| <b>O16</b>  | 0,186368  | <b>O16</b>  | 0,185708  | <b>O16</b>  | 0,185822  | <b>O16</b>  | 0,184761  |
| <b>H17</b>  | 0,000468  | <b>H17</b>  | 0,000456  | <b>H17</b>  | 0,000462  | <b>H17</b>  | 0,00043   |
| <b>H18</b>  | -0,000346 | <b>H18</b>  | -0,000343 | <b>H18</b>  | -0,000348 | <b>H18</b>  | -0,000338 |
| <b>H19</b>  | -0,000119 | <b>H19</b>  | -0,000103 | <b>H19</b>  | -0,000107 | <b>H19</b>  | -8,70E-05 |
| <b>H20</b>  | -5,10E-05 | <b>H20</b>  | -3,10E-05 | <b>H20</b>  | -3,40E-05 | <b>H20</b>  | -6,10E-05 |
| <b>H21</b>  | 0,000103  | <b>C21</b>  | 0,000931  | <b>C21</b>  | 0,000904  | <b>C21</b>  | 0,00017   |
| <b>H22</b>  | -6,10E-05 | <b>H22</b>  | -3,00E-06 | <b>H22</b>  | -1,20E-05 | <b>C22</b>  | 9,81E-04  |
|             |           | <b>H23</b>  | 0,000246  | <b>C23</b>  | 0,000617  | <b>H23</b>  | 2,60E-05  |
|             |           | <b>H24</b>  | 5,80E-05  | <b>H24</b>  | -1,70E-05 | <b>C24</b>  | -3,26E-04 |
|             |           | <b>H25</b>  | 0,000607  | <b>H25</b>  | 0,00034   | <b>H25</b>  | 7,00E-06  |
|             |           |             |           | <b>H26</b>  | 2,50E-05  | <b>C26</b>  | 8,64E-04  |
|             |           |             |           | <b>H27</b>  | 9,10E-05  | <b>H27</b>  | 2,00E-06  |
|             |           |             |           | <b>H28</b>  | 3,60E-05  | <b>C28</b>  | -3,20E-04 |
|             |           |             |           |             |           | <b>H29</b>  | 3,00E-06  |
|             |           |             |           |             |           | <b>C30</b>  | 0,001059  |
|             |           |             |           |             |           | <b>H31</b>  | 3,80E-05  |
|             |           |             |           |             |           | <b>H32</b>  | -1,30E-05 |



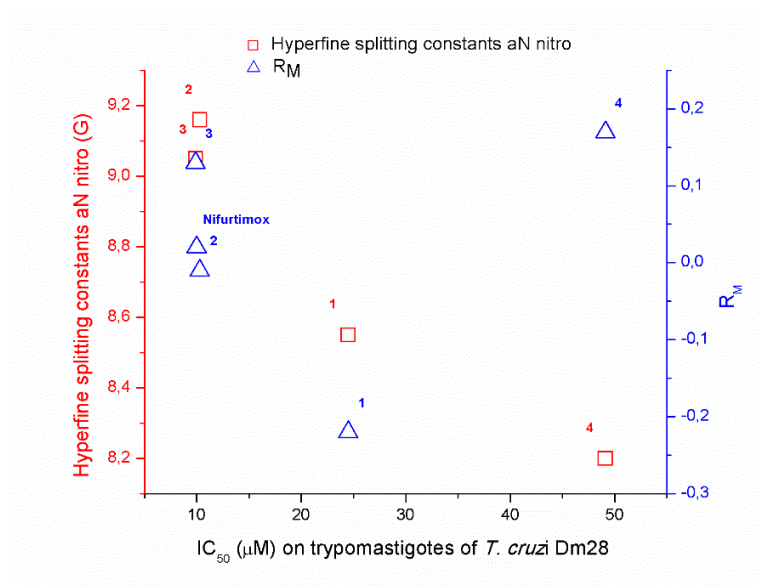

**Figure S8:** Correlation between the anti-*T. cruzi* activity and the hyperfine splitting constant on the nitrogen atom (N6) and  $R_M$  values of the  $[\text{AuCl}(\text{HL})]$  compounds

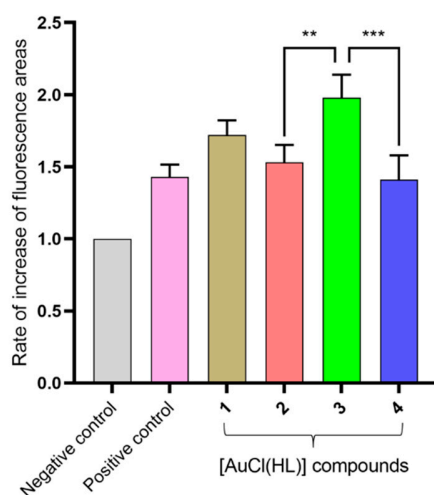

**Figure S9:** Rate of increase in areas of fluorescence spectra concerning compound **3**. One-way analysis of variance (ANOVA) compared to compound 3 rate was performed with subsequent Dunnett's test (\*\* $p < 0.01$ ; \*\*\* $p < 0.001$ ; \*\*\*\* $p < 0.0001$ ).
